# Supplementary material for: DFT investigation of the DDQ-catalytic mechanism for constructing C–O bonds
Source: Royal Society of Chemistry journal article supplement (doi:10.1039/d4ob00346b), 2024-01-01
Supplement: d4ob00346b1.pdf [file d4ob00346b1.pdf]

## DFT Investigation the DDQ-Catalytic Mechanism for Constructing C-O Bond

Xiu-Fang Zheng, Da-Gang Zhou\*, and Li-Jun Yang\*

*Chemical Synthesis and Pollution Control Key Laboratory of Sichuan Province, College of  
Chemistry and Chemical Engineering, China West Normal University, Nanchong, People's  
Republic of China*

*Da-Gang Zhou is the first corresponding author;*

*Li-Jun Yang is the second corresponding author.*

## 1. The definition of the relevant parameters of excited states of DDQ.

- (1)  $D(\text{Å})$ : the distance of the centroids between the hole and the electron.
- (2)  $S_r$ : the geometric mean of overlap function between the hole and the electron.
- (3)  $H(\text{Å})$ : the overall average distribution breadth of electron and hole.
- (4)  $t(\text{Å})$ : the degree of separation of hole and electron.
- (5)  $E_{\text{coul}}(\text{eV})$ : exciton binding energy. (Coulomb attraction energy between hole and electron)
- (6) HDI: hole delocalization index; EDI: electron delocalization index; the smaller the HDI (EDI) value, the higher the degree of hole (electron) delocalization, that is, the greater the degree of uniformity of distribution.

The website (<http://sobereva.com/434>) has all the definitions of these parameters. The above related are defined as follows:

$$D_x = |X_{ele} - X_{hole}|$$

$$D_y = |Y_{ele} - Y_{hole}|$$

$$D_z = |Z_{ele} - Z_{hole}|$$

$$D \text{ index} = \sqrt{(D_x)^2 + (D_y)^2 + (D_z)^2}$$

$$S_r(r) = \sqrt{\rho^{hole}(r)\rho^{ele}(r)}$$

$$S_r \text{ index} = \int S_r(r) dr = \int \sqrt{\rho^{hole}(r)\rho^{ele}(r)} dr$$

$$\sigma_{hole,x} = \sqrt{\int (x - X_{hole})^2 \rho^{hole}(r) dr}$$

$$\sigma_{ele,x} = \sqrt{\int (x - X_{ele})^2 \rho^{ele}(r) dr}$$

$$H \text{ index} = \frac{|\sigma_{ele}| + |\sigma_{hole}|}{2}$$

$$H_{CT} = |H \cdot u_{CT}|$$

$$t \text{ index} = D \text{ index} - H_{CT}$$

$$HDI = 100X \sqrt{\int [\rho^{hole}(r)]^2 dr}$$

$$EDI = 100X \sqrt{\int [\rho^{ele}(r)]^2 dr}$$

$$E_C = \iint \frac{|\rho^{hole}(r_1)| + |\rho^{ele}(r_2)|}{|r_1 - r_2|} dr_1 dr_2$$

**2. The substrate in each of the three schemes is excited at the DDQ coordination of the hole- electron diagram.**

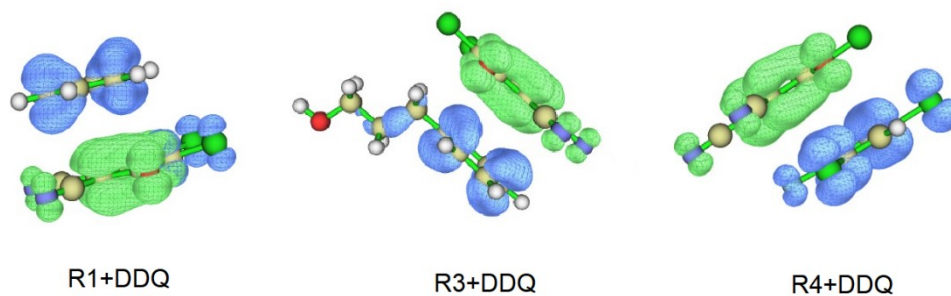

Figure s1. The  $\rho_{hole}$ (bule) and  $\rho_{ele}$ (green) of R1, R3 and R4+ DDQ.

### 3. The intersystem crossing process (ISC) from DDQ to $^3\text{DDQ}^*$ .

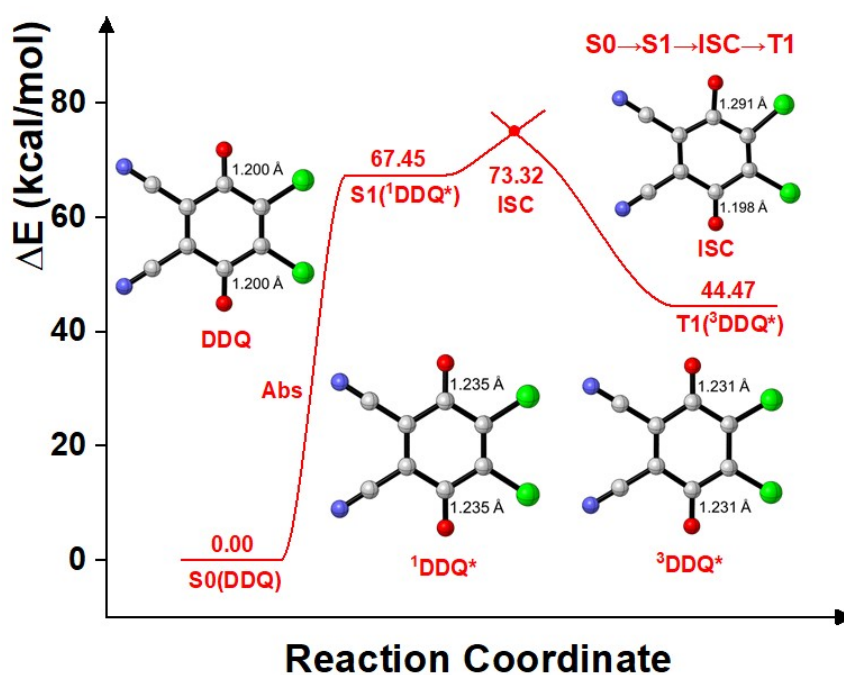

Figure s2. The energy diagram of  $S_0 \rightarrow S_1 \rightarrow \text{ISC} \rightarrow T_1$ .

$S_0(\text{DDQ})$  is firstly excited to generate  $S_1(^1\text{DDQ}^*)$  under photocatalysis. As we all know, the triplet excited state  $T_1(^3\text{DDQ}^*)$  is more stable than the singlet excited state  $^1\text{DDQ}^*$ . There is an energy intersection between the excited singlet state ( $S_1$ ) and the triplet state ( $T_1$ ), where ISC may occur. Therefore, considering that the singlet excited state  $^1\text{DDQ}^*$  occurs intersystem crossing (ISC) and releases part of the energy to transform into the stable triplet excited state  $^3\text{DDQ}^*$ , The calculation results show that the energy of  $^3\text{DDQ}^*$  is 22.98 kcal/mol lower than that of  $^1\text{DDQ}^*$ , indicating that this step is an exothermic reaction. Then, the triplet excited state  $^3\text{DDQ}^*$  with high REDOX potential can participate in the subsequent reaction.

#### 4. The paths a and a1 from IM3a to product P3 in system3.

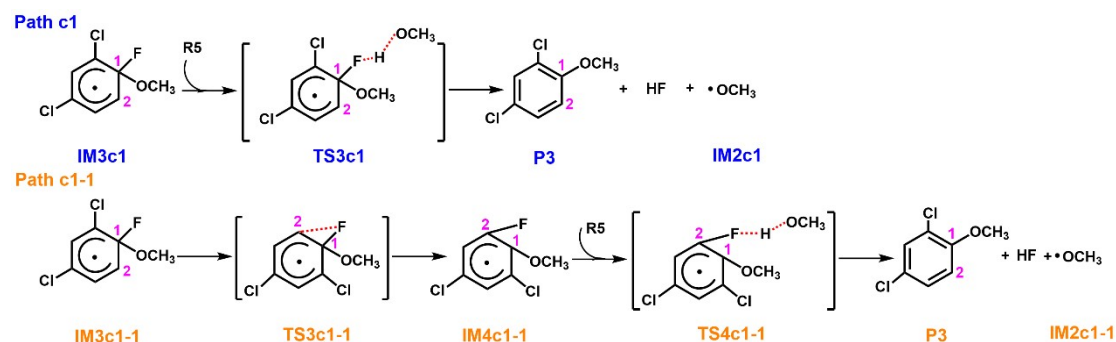

Figure s3. The detailed reaction process from IM3a to P3 in path c1 and c1-1.

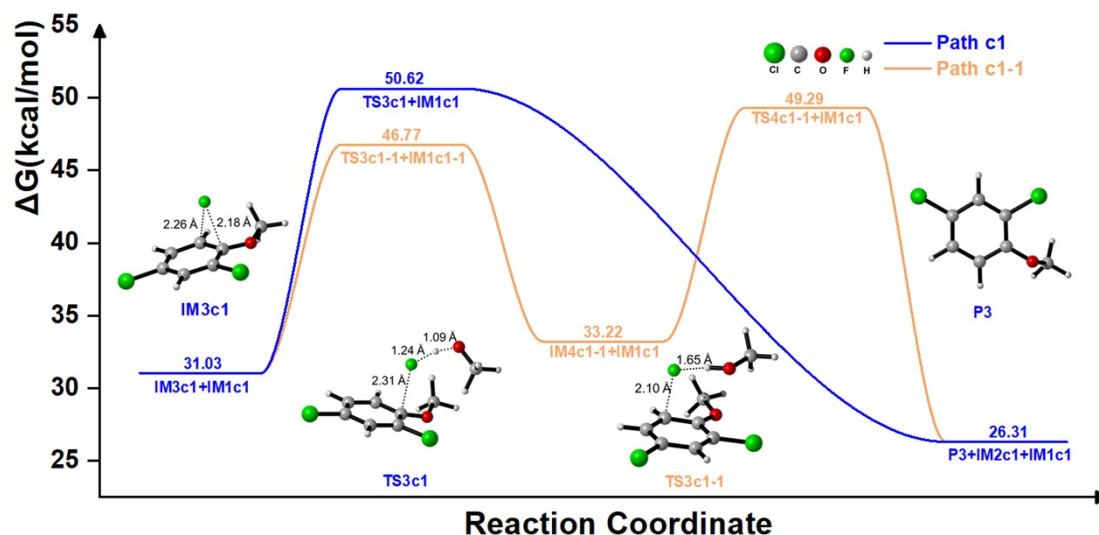

Figure s4. The Gibbs free energy surfaces of Path c1 and c1-1.

In path c1, IM3c1 directly reacts with R5 via transition state TS3c1 to produce the product P3, which step would overcome the energy barrier of 19.59 kcal/mol. While, in path c1-1, IM3c1 firstly undergoes transition state TS3c1-1 on its own to complete the migration of the F atom to the C2 atom to produce the intermediate IM4c1-1. Then the IM4c1-1 would interact with R5 via transition state TS4c1-1 with overcoming an energy barrier of 16.07 kcal/mol. Path a1 has more steps and during the formation of IM4c1-1 would absorb heat which makes the reaction more difficult. In comparison, path c1 is favorable.

**5.The Cartesian coordinates (Angstrom) for the optimized reactants, intermediates, transition states and product obtained at the M06-2X-D3/ ma-def2-SVP level of theory in the solvent of acetonitrile (system1&2) and C<sub>2</sub>H<sub>4</sub>Cl/TFE(1:1) (system3).**

**Scheme1**

**<sup>3</sup>DDQ\***

|    |             |             |             |
|----|-------------|-------------|-------------|
| C  | -1.15397800 | 0.73340800  | 0.00002300  |
| C  | 0.08590900  | 1.49128900  | -0.00002100 |
| C  | 1.31487800  | 0.68533800  | -0.00002300 |
| C  | 1.31487700  | -0.68533800 | 0.00003200  |
| C  | 0.08590900  | -1.49128900 | 0.00002900  |
| C  | -1.15397800 | -0.73340800 | -0.00001500 |
| C  | 2.54497100  | -1.42694300 | 0.00007600  |
| N  | 3.53091800  | -2.02554600 | 0.00012000  |
| C  | 2.54497100  | 1.42694300  | -0.00006800 |
| N  | 3.53091800  | 2.02554600  | -0.00011300 |
| O  | 0.09835600  | -2.72162700 | 0.00003400  |
| O  | 0.09835600  | 2.72162700  | -0.00002600 |
| Cl | -2.59222600 | -1.57671200 | -0.00013700 |
| Cl | -2.59222600 | 1.57671200  | 0.00014400  |

**R1**

|   |             |             |             |
|---|-------------|-------------|-------------|
| C | -1.33263600 | -0.41772500 | -0.00000300 |
| C | -0.30439200 | -1.36259100 | 0.00012000  |
| C | 1.02790700  | -0.94500500 | -0.00008700 |
| C | 1.33259800  | 0.41783300  | 0.00001900  |
| C | 0.30450500  | 1.36256200  | 0.00008000  |
| C | -1.02798200 | 0.94492800  | -0.00008500 |
| H | -2.37413100 | -0.74384300 | -0.00007100 |
| H | -0.54238800 | -2.42768000 | 0.00003400  |
| H | 1.83098100  | -1.68410400 | -0.00018500 |
| H | 2.37417000  | 0.74368400  | -0.00002000 |
| H | 0.54224800  | 2.42769900  | 0.00004500  |
| H | -1.83088000 | 1.68422900  | -0.00006500 |

**DDQ-**

|    |             |             |             |
|----|-------------|-------------|-------------|
| C  | 1.10974800  | -0.67938100 | 0.00000000  |
| C  | -0.13353600 | -1.48154700 | -0.00000300 |
| C  | -1.35637400 | -0.69800000 | -0.00000100 |
| C  | -1.35637400 | 0.69800000  | -0.00000200 |
| C  | -0.13353700 | 1.48154700  | -0.00000200 |
| C  | 1.10974800  | 0.67938200  | 0.00000000  |
| Cl | 2.57333000  | 1.58774100  | -0.00000300 |
| Cl | 2.57333100  | -1.58774100 | -0.00000400 |
| O  | -0.12264400 | 2.71108400  | 0.00001600  |
| O  | -0.12264300 | -2.71108400 | 0.00001400  |
| C  | -2.57988700 | 1.43644400  | -0.00000300 |
| N  | -3.57216700 | 2.03093600  | -0.00000700 |
| C  | -2.57988700 | -1.43644400 | 0.00000000  |
| N  | -3.57216700 | -2.03093700 | -0.00000300 |



**IM1a1**

|   |             |             |             |
|---|-------------|-------------|-------------|
| C | 0.00055600  | -1.38191500 | 0.00000100  |
| C | 1.24663400  | -0.68320000 | 0.00000800  |
| C | 1.24607200  | 0.68413300  | -0.00000800 |
| C | -0.00056600 | 1.38191400  | 0.00000600  |
| C | -1.24662700 | 0.68320300  | -0.00001100 |
| C | -1.24606700 | -0.68413600 | 0.00000600  |
| H | 0.00098200  | -2.47305900 | -0.00003000 |
| H | 2.17624200  | -1.25240900 | 0.00000000  |
| H | 2.17522000  | 1.25409000  | -0.00001900 |
| H | -0.00095600 | 2.47305800  | 0.00004200  |
| H | -2.17625800 | 1.25237700  | -0.00002400 |
| H | -2.17524000 | -1.25405200 | 0.00002100  |

**R2**

|   |            |             |             |
|---|------------|-------------|-------------|
| O | 0.00000000 | 0.00000000  | 0.12055500  |
| H | 0.00000000 | 0.75423000  | -0.48222100 |
| H | 0.00000000 | -0.75423000 | -0.48222100 |

**R2+ DDQ-**

|    |             |             |             |
|----|-------------|-------------|-------------|
| C  | 0.92818500  | -0.38129200 | 0.03453300  |
| C  | 0.47691600  | 1.02160100  | 0.04521700  |
| C  | -0.95999700 | 1.20133300  | 0.01968900  |
| C  | -1.84859900 | 0.12775900  | -0.01005600 |
| C  | -1.40453100 | -1.25594300 | -0.01916900 |
| C  | 0.06376700  | -1.43046100 | 0.00407300  |
| Cl | 0.61487900  | -3.06044200 | -0.00828000 |
| Cl | 2.63534000  | -0.61281200 | 0.06945400  |
| O  | -2.18046600 | -2.20880800 | -0.04389100 |
| O  | 1.26299400  | 1.97492800  | 0.07455900  |
| C  | -3.26205800 | 0.34006800  | -0.03292200 |
| N  | -4.40499500 | 0.51492600  | -0.05133200 |
| C  | -1.43177000 | 2.55173000  | 0.02692900  |
| N  | -1.81908200 | 3.64110400  | 0.03246600  |
| O  | 4.10195200  | 2.29543200  | -0.09914000 |
| H  | 4.31688700  | 1.66658600  | -0.79779700 |
| H  | 3.15061800  | 2.14533300  | 0.02791600  |

**TS1a1**

|    |             |             |             |
|----|-------------|-------------|-------------|
| C  | -0.11740500 | 1.66885900  | 0.04928000  |
| C  | 1.11904200  | 0.86351500  | -0.04899900 |
| C  | 1.10514700  | -0.48815800 | -0.17383600 |
| C  | -0.13937100 | -1.26109100 | -0.15838300 |
| C  | -1.34898600 | -0.49115600 | -0.17676000 |
| C  | -1.34781700 | 0.89762500  | -0.03259700 |
| Cl | 2.55220000  | -1.40776200 | -0.30682100 |
| Cl | 2.59072700  | 1.75722300  | -0.00115300 |
| C  | -2.57165500 | -1.22400700 | -0.30116900 |
| C  | -2.56695500 | 1.63930500  | 0.00849300  |
| N  | -3.56450600 | -1.80875400 | -0.39679300 |
| N  | -3.55568200 | 2.23889700  | 0.04268000  |
| O  | -0.10019700 | 2.88967000  | 0.17780500  |
| O  | -0.15559500 | -2.52757900 | -0.55840000 |
| O  | 0.06302400  | -2.08115000 | 1.65031100  |
| H  | -0.80119200 | -1.99852800 | 2.08290100  |
| H  | -0.03710000 | -2.83017900 | 0.47753700  |

**DDQH<sup>-</sup>**

|    |             |             |             |
|----|-------------|-------------|-------------|
| C  | -0.11403600 | 1.37178900  | 0.00004900  |
| C  | -1.34850400 | 0.67007200  | 0.00003900  |
| C  | -1.37158300 | -0.71432200 | 0.00005300  |
| C  | -0.14009100 | -1.50491900 | 0.00015600  |
| C  | 1.11224900  | -0.73040900 | 0.00003200  |
| C  | 1.11181600  | 0.64127300  | 0.00002200  |
| C  | -2.56235200 | 1.43866800  | -0.00000300 |
| N  | -3.54076300 | 2.04893700  | -0.00004100 |
| C  | -2.60434600 | -1.44108100 | -0.00000700 |
| N  | -3.59671600 | -2.03081600 | -0.00003200 |
| O  | -0.15261500 | -2.73044100 | -0.00004800 |
| O  | -0.16911100 | 2.68124000  | 0.00002300  |
| H  | 0.70905600  | 3.10826300  | 0.00000500  |
| Cl | 2.57422500  | 1.55214200  | -0.00004500 |
| Cl | 2.56272700  | -1.62437200 | -0.00003400 |

**IM2a1**

|   |            |            |             |
|---|------------|------------|-------------|
| O | 0.00000000 | 0.00000000 | 0.10890100  |
| H | 0.00000000 | 0.00000000 | -0.87121100 |

**TS2a1**

|   |             |             |             |
|---|-------------|-------------|-------------|
| C | 1.69929200  | 0.10069800  | 0.38792100  |
| C | 1.14693300  | -1.16270900 | 0.12020300  |
| C | -0.10770100 | -1.26622400 | -0.45229800 |
| C | -0.87538700 | -0.09755400 | -0.71482900 |
| C | -0.26406600 | 1.17048700  | -0.52291200 |
| C | 0.99485000  | 1.26242800  | 0.05656800  |
| H | 2.69058200  | 0.17657000  | 0.83873700  |
| H | 1.71756900  | -2.06329600 | 0.35462800  |
| H | -0.53801100 | -2.24554800 | -0.66973200 |
| H | -1.75628200 | -0.17256400 | -1.35138600 |
| H | -0.80919700 | 2.07356800  | -0.80653800 |
| H | 1.44272400  | 2.24159800  | 0.23596600  |
| O | -2.01583300 | -0.11246200 | 0.90150100  |
| H | -2.18425400 | 0.84660800  | 0.93839200  |

**IM3a1**

|   |             |             |             |
|---|-------------|-------------|-------------|
| C | 1.12381800  | 1.24142700  | -0.05282500 |
| C | -0.21851000 | 1.24173900  | 0.19015100  |
| C | -1.01009800 | -0.02104400 | 0.38072800  |
| C | -0.18212400 | -1.25488900 | 0.19015000  |
| C | 1.16045300  | -1.21227300 | -0.04604700 |
| C | 1.84895900  | 0.02478800  | -0.16071900 |
| H | 1.65205200  | 2.18945300  | -0.17690400 |
| H | -0.76998900 | 2.18342700  | 0.26606200  |
| H | -1.39275600 | -0.03118700 | 1.42616700  |
| H | -0.71158000 | -2.20829000 | 0.25790900  |
| H | 1.71723300  | -2.14471800 | -0.16234300 |
| H | 2.92141200  | 0.03977500  | -0.35559100 |
| O | -2.12482800 | -0.09244400 | -0.50337800 |
| H | -2.75273300 | 0.59259500  | -0.23690100 |



**TS1a2**

|    |             |             |             |
|----|-------------|-------------|-------------|
| C  | -0.88868900 | 1.53271900  | 0.08161100  |
| C  | 0.55501900  | 1.25398600  | -0.01689300 |
| C  | 1.01898400  | -0.03509200 | -0.18874500 |
| C  | 0.15737300  | -1.20443000 | -0.18435000 |
| C  | -1.25593500 | -0.93072100 | -0.11046600 |
| C  | -1.75044100 | 0.35773900  | 0.00858900  |
| Cl | 2.68203100  | -0.33047700 | -0.45046100 |
| Cl | 1.59362400  | 2.59611900  | 0.04081600  |
| C  | -2.13102800 | -2.06719100 | -0.13009700 |
| C  | -3.15860900 | 0.60583700  | 0.09437100  |
| N  | -2.83724800 | -2.97996400 | -0.14498000 |
| N  | -4.29327100 | 0.80779200  | 0.16456700  |
| O  | -1.32246400 | 2.67324200  | 0.21152800  |
| O  | 0.61725300  | -2.37169800 | -0.19165000 |
| O  | 2.77280900  | -2.20995300 | 1.03302300  |
| H  | 3.50921800  | -2.66707000 | 0.57219900  |
| H  | 1.89744400  | -2.45345600 | 0.50733000  |

**DDQH**

|    |             |             |             |
|----|-------------|-------------|-------------|
| C  | 0.11357800  | 1.37314500  | -0.00000800 |
| C  | 1.34801900  | 0.67242200  | 0.00000000  |
| C  | 1.37139200  | -0.71336500 | -0.00000200 |
| C  | 0.14150200  | -1.50671100 | -0.00004400 |
| C  | -1.11052600 | -0.73099600 | -0.00000400 |
| C  | -1.11118000 | 0.64035200  | -0.00000100 |
| C  | 2.56048500  | 1.44259300  | 0.00001200  |
| N  | 3.53748100  | 2.05532000  | 0.00001700  |
| C  | 2.60326400  | -1.44038300 | 0.00001600  |
| N  | 3.59476600  | -2.03175200 | -0.00000800 |
| O  | 0.15481600  | -2.73099000 | -0.00000500 |
| O  | 0.16239700  | 2.68262600  | -0.00000700 |
| H  | -0.72526100 | 3.09067300  | -0.00001000 |
| Cl | -2.57383500 | 1.55110700  | -0.00000400 |
| Cl | -2.55777600 | -1.62705200 | 0.00001800  |

**TS3a2-1**

|    |             |             |             |
|----|-------------|-------------|-------------|
| C  | -0.89235000 | -1.05965800 | 0.61093400  |
| C  | -0.28550900 | 0.17425100  | 0.98708600  |
| C  | -0.95920500 | 1.35749900  | 0.60496200  |
| C  | -2.20316600 | 1.31833000  | -0.04868300 |
| C  | -2.79733300 | 0.09053700  | -0.37753800 |
| C  | -2.11493600 | -1.09963000 | -0.04220600 |
| Cl | -2.84983500 | -2.59664000 | -0.48539100 |
| Cl | -0.04339600 | -2.50423500 | 0.98897000  |
| C  | -2.88717700 | 2.52821000  | -0.40384300 |
| C  | -0.32841100 | 2.60776700  | 0.91156700  |
| O  | -3.97247100 | 0.10733900  | -0.99378000 |
| H  | -4.30130400 | -0.79261100 | -1.16478200 |
| O  | 0.84268400  | 0.21330900  | 1.62728800  |
| N  | -3.43026400 | 3.50662500  | -0.68629700 |
| N  | 0.19243800  | 3.61175900  | 1.14393300  |
| C  | 5.25281300  | 0.26482000  | -0.64406600 |
| C  | 4.73876400  | -1.03884800 | -0.37860000 |
| C  | 3.41030600  | -1.24920200 | -0.17422300 |
| C  | 2.43438800  | -0.12354000 | -0.31931400 |
| C  | 3.03322500  | 1.23788200  | -0.49015600 |
| C  | 4.37234500  | 1.38541800  | -0.67785400 |
| H  | 6.32255800  | 0.40714000  | -0.79323500 |
| H  | 5.43188200  | -1.88050600 | -0.31638300 |
| H  | 3.01740500  | -2.24067800 | 0.06468700  |
| H  | 2.35377800  | 2.09335100  | -0.48830000 |
| H  | 4.78693200  | 2.38273900  | -0.83878500 |
| O  | 1.44492400  | -0.33612200 | -1.25681600 |
| H  | 1.31088200  | -1.29319800 | -1.38194800 |
| H  | 1.76396600  | -0.02927600 | 0.79254100  |

**DDQH<sub>2</sub>**

|    |             |             |             |
|----|-------------|-------------|-------------|
| C  | -1.08694100 | 0.69438600  | -0.00002600 |
| C  | 0.12342000  | 1.42620300  | -0.00004500 |
| C  | 1.32050200  | 0.70899100  | 0.00001300  |
| C  | 1.32050200  | -0.70899100 | 0.00001300  |
| C  | 0.12342000  | -1.42620300 | -0.00004500 |
| C  | -1.08694100 | -0.69438600 | -0.00002600 |
| Cl | -2.56061100 | -1.57701500 | 0.00003500  |
| Cl | -2.56061100 | 1.57701500  | 0.00003500  |
| O  | 0.04299700  | 2.75535100  | -0.00008100 |
| H  | 0.92203400  | 3.17281900  | -0.00004600 |
| O  | 0.04299700  | -2.75535100 | -0.00008100 |
| H  | 0.92203400  | -3.17281900 | -0.00004600 |
| C  | 2.55834100  | -1.43024800 | 0.00003300  |
| N  | 3.53892100  | -2.04050300 | 0.00003500  |
| C  | 2.55834100  | 1.43024800  | 0.00003300  |
| N  | 3.53892100  | 2.04050300  | 0.00003500  |

**TS3a2-2**

|   |             |             |             |
|---|-------------|-------------|-------------|
| C | -0.92662300 | -1.51136700 | 0.34750500  |
| C | 0.36118000  | -1.16270800 | 0.78717400  |
| C | 1.09419300  | 0.02977200  | 0.25975700  |
| C | 0.18469400  | 0.96523300  | -0.49818100 |
| C | -1.02456600 | 0.53798300  | -0.99538100 |
| C | -1.62034400 | -0.71645600 | -0.53970800 |
| H | -1.38203800 | -2.43039600 | 0.72339500  |
| H | 0.89141100  | -1.80515300 | 1.49267400  |
| H | 1.12630962  | 0.62807243  | 1.35383738  |
| H | 0.63929100  | 1.87433800  | -0.89662700 |
| H | -1.59038900 | 1.17754800  | -1.67537700 |
| H | -2.60949900 | -1.00092900 | -0.89908100 |
| O | 2.13516600  | -0.44880900 | -0.60316600 |
| H | 2.79531000  | 0.25143700  | -0.70218100 |
| O | 1.23848173  | 1.28598662  | 2.63254145  |
| H | 1.89879088  | 1.56064702  | 3.29373048  |

**O<sub>2</sub>**

|   |            |            |             |
|---|------------|------------|-------------|
| O | 0.00000000 | 0.00000000 | 0.59125500  |
| O | 0.00000000 | 0.00000000 | -0.59125500 |

**IM2a2-3**

|   |             |             |             |
|---|-------------|-------------|-------------|
| C | 1.36667400  | -1.65031700 | -0.06555100 |
| C | 2.26492700  | -0.49465600 | 0.09153200  |
| C | 1.77962400  | 0.75185400  | 0.01353600  |
| C | 0.32817900  | 0.99650800  | -0.30326100 |
| C | -0.52855400 | -0.12505100 | 0.25805700  |
| C | 0.03712200  | -1.48933800 | -0.01824000 |
| H | 1.80047800  | -2.64388800 | -0.19524500 |
| H | 3.33016300  | -0.67180200 | 0.25026200  |
| H | 2.41881600  | 1.63457000  | 0.09025800  |
| H | -0.67571500 | 0.02711600  | 1.34277400  |
| H | -0.66094900 | -2.32701100 | -0.08424200 |
| H | 0.22124500  | 0.96486500  | -1.40963600 |
| O | -0.05951400 | 2.24740300  | 0.20096300  |
| H | -0.93155100 | 2.45950200  | -0.15770900 |
| O | -1.83209400 | 0.03281100  | -0.35728300 |
| O | -2.73218200 | -0.70238300 | 0.19470800  |

**TS3a2-3**

|   |             |             |             |
|---|-------------|-------------|-------------|
| C | 1.38328266  | -1.64540231 | 0.10628778  |
| C | 2.28153566  | -0.48974131 | 0.26337078  |
| C | 1.79623266  | 0.75676869  | 0.18537478  |
| C | 0.34478766  | 1.00142269  | -0.13142222 |
| C | -0.51194534 | -0.12013631 | 0.42989578  |
| C | 0.05373066  | -1.48442331 | 0.15359878  |
| H | 1.81708666  | -2.63897331 | -0.02340622 |
| H | 3.34677166  | -0.66688731 | 0.42210078  |
| H | 2.43542466  | 1.63948469  | 0.26209678  |
| H | -0.65910634 | 0.03203069  | 1.51461278  |
| H | -0.64434034 | -2.32209631 | 0.08759678  |
| H | -0.20223413 | 0.77693309  | -1.55831811 |
| O | -0.04290534 | 2.25231769  | 0.37280178  |
| H | -0.91494234 | 2.46441669  | 0.01412978  |
| O | -1.81548534 | 0.03772569  | -0.18544422 |
| O | -1.34778551 | 0.26164473  | -1.49312007 |



**TS3a2-4**

|    |             |             |             |
|----|-------------|-------------|-------------|
| C  | -2.35830000 | -1.00430500 | -0.02407000 |
| C  | -2.93285900 | 0.34387900  | -0.29985100 |
| C  | -2.05296100 | 1.50241700  | 0.02321900  |
| C  | -0.82750900 | 1.32634500  | 0.59483400  |
| C  | -0.31946600 | -0.00636400 | 0.95515600  |
| C  | -1.13484400 | -1.15950500 | 0.53810200  |
| O  | 0.74901100  | -0.13812700 | 1.54850200  |
| O  | -4.02908200 | 0.49652500  | -0.78124800 |
| Cl | -0.43759500 | -2.69867500 | 0.82034400  |
| Cl | -3.33170200 | -2.32899000 | -0.48707900 |
| C  | 0.08104100  | 2.41369400  | 0.82266800  |
| C  | -2.54552600 | 2.80114200  | -0.32848800 |
| N  | 0.85131400  | 3.26070500  | 0.96993200  |
| N  | -2.93232500 | 3.85095300  | -0.61273000 |
| C  | 4.73194000  | 0.94890300  | -0.09450400 |
| C  | 3.38328700  | 1.13938400  | -0.26106800 |
| C  | 2.49008400  | -0.00797200 | -0.48285600 |
| C  | 3.15051600  | -1.28154200 | -0.80910800 |
| C  | 4.50048700  | -1.43524800 | -0.62748900 |
| C  | 5.29987600  | -0.33276100 | -0.25317800 |
| H  | 5.37390500  | 1.79826700  | 0.14231900  |
| H  | 2.91881700  | 2.12071400  | -0.13787400 |
| H  | 2.07700000  | -0.20101600 | 0.59791600  |
| H  | 2.50662900  | -2.10945300 | -1.11218000 |
| H  | 4.96778500  | -2.40572500 | -0.80019600 |
| H  | 6.37380100  | -0.46723800 | -0.11983400 |
| O  | 1.29644600  | 0.25311200  | -1.16753300 |
| H  | 1.50160700  | 0.57266700  | -2.05405500 |

**IM3a2-3**

|   |             |             |             |
|---|-------------|-------------|-------------|
| O | 1.35502600  | -0.89611600 | -0.56037100 |
| O | 2.62625400  | -0.36525300 | -0.23782300 |
| C | -2.31016500 | 0.21844600  | -0.31090700 |
| C | -1.33198100 | 1.22782900  | -0.22492500 |
| C | -0.04942700 | 0.93145500  | 0.16634200  |
| C | 0.41220800  | -0.47239100 | 0.43627900  |
| C | -0.71058400 | -1.45987700 | 0.40244200  |
| C | -1.97312600 | -1.12085100 | 0.02219000  |
| H | -3.32352800 | 0.46934400  | -0.62192900 |
| H | -1.59240800 | 2.26520200  | -0.45307900 |
| H | 0.95304800  | -0.49448500 | 1.40163700  |
| H | -0.45540300 | -2.49053600 | 0.65334400  |
| H | -2.74682100 | -1.88931700 | -0.01984000 |
| O | 0.92115600  | 1.84323800  | 0.31422500  |
| H | 0.59032000  | 2.71541300  | 0.06615100  |
| H | 3.13375500  | -1.17822700 | -0.10305200 |

**·HO<sub>2</sub>**

|   |             |            |            |
|---|-------------|------------|------------|
| O | 0.24000000  | 0.37599999 | 0.00000000 |
| H | -0.08045459 | 1.28093583 | 0.00000000 |
| O | 1.56000000  | 0.37599999 | 0.00000000 |

**P1**

|   |             |             |             |
|---|-------------|-------------|-------------|
| C | 1.85508600  | 0.03487600  | -0.00006900 |
| C | 1.12192400  | 1.22207300  | 0.00002000  |
| C | -0.27261100 | 1.19672800  | 0.00002000  |
| C | -0.94598000 | -0.03011300 | -0.00003600 |
| C | -0.21587200 | -1.22516600 | 0.00009200  |
| C | 1.17610700  | -1.18613700 | 0.00001000  |
| H | 2.94561800  | 0.05962200  | -0.00012500 |
| H | 1.63809600  | 2.18422400  | 0.00009400  |
| H | -0.84797700 | 2.12614800  | 0.00009700  |
| H | -0.75887900 | -2.17182000 | 0.00022300  |
| H | 1.73708100  | -2.12297400 | 0.00000800  |
| O | -2.29359600 | -0.11543000 | -0.00013600 |
| H | -2.67709800 | 0.77466800  | 0.00056600  |

## System 2

### R3

|   |             |             |             |
|---|-------------|-------------|-------------|
| C | -0.89390600 | 0.36167100  | -0.12386100 |
| C | -1.48702000 | -0.20269100 | -1.26750000 |
| C | -2.87384600 | -0.39561600 | -1.28098100 |
| C | -3.65357300 | -0.04085000 | -0.18274400 |
| C | -3.05177800 | 0.50549600  | 0.94998900  |
| C | -1.66938700 | 0.71057000  | 0.99646200  |
| C | 0.57965800  | 0.62649800  | -0.12095000 |
| C | 1.54190200  | -0.35584900 | 0.17821000  |
| C | 2.90827500  | -0.06123500 | 0.08437900  |
| C | 3.33346800  | 1.21301600  | -0.27869100 |
| C | 2.38774500  | 2.19639300  | -0.56776500 |
| C | 1.02767100  | 1.89949400  | -0.49592300 |
| H | -3.34091800 | -0.83090400 | -2.16737200 |
| H | -4.73410500 | -0.19510700 | -0.20688600 |
| H | -3.65875600 | 0.77325400  | 1.81804600  |
| H | 3.63765000  | -0.83988600 | 0.30966700  |
| H | 4.39975900  | 1.43618300  | -0.33728600 |
| H | 2.70839100  | 3.19858800  | -0.85787500 |
| H | 0.28910000  | 2.66660000  | -0.73968400 |
| C | -1.00910500 | 1.25441600  | 2.23436500  |
| H | -0.25604600 | 0.54032000  | 2.60272200  |
| H | -0.48602100 | 2.20137600  | 2.03264500  |
| H | -1.74533700 | 1.42740200  | 3.03035800  |
| C | -0.64645300 | -0.60829400 | -2.45078200 |
| H | -0.04135100 | 0.23326900  | -2.82064300 |
| H | 0.05763500  | -1.41123400 | -2.17929100 |
| H | -1.27778100 | -0.97115900 | -3.27243900 |
| C | 1.12284700  | -1.71910900 | 0.62741600  |
| O | 0.10886500  | -1.97134500 | 1.22582300  |
| O | 2.02062400  | -2.65718000 | 0.31123300  |
| H | 1.71288200  | -3.50397000 | 0.68185300  |

**TS1b1**

|   |             |             |             |
|---|-------------|-------------|-------------|
| C | 3.16122600  | -0.88811300 | 0.04837400  |
| C | 2.92232000  | -1.19169600 | 1.40217000  |
| C | 2.32509300  | -2.41884200 | 1.71547400  |
| C | 1.97101800  | -3.31877800 | 0.71071500  |
| C | 2.21247900  | -3.00367200 | -0.62348700 |
| C | 2.81350600  | -1.79071000 | -0.97695600 |
| C | 3.77806400  | 0.43188900  | -0.28776700 |
| C | 2.99359100  | 1.59920800  | -0.38245900 |
| C | 3.56010200  | 2.85834800  | -0.60734200 |
| C | 4.93840600  | 2.96655600  | -0.74690000 |
| C | 5.73570800  | 1.82166300  | -0.65145600 |
| C | 5.16311100  | 0.57274100  | -0.40798900 |
| H | 2.12801900  | -2.66354600 | 2.76116900  |
| H | 1.49664100  | -4.26633600 | 0.97063400  |
| H | 1.92851800  | -3.70533800 | -1.40984800 |
| H | 2.91670000  | 3.73762700  | -0.66403000 |
| H | 5.39480500  | 3.94106000  | -0.92314300 |
| H | 6.81791000  | 1.90440400  | -0.76350700 |
| H | 5.79427900  | -0.31252900 | -0.30990100 |
| C | 3.09716200  | -1.46145400 | -2.41807000 |
| H | 2.68188800  | -0.48045600 | -2.68748200 |
| H | 4.18091500  | -1.42230600 | -2.60693700 |
| H | 2.66368000  | -2.21619600 | -3.08515200 |
| C | 3.27632300  | -0.21260300 | 2.49411300  |
| H | 4.33365500  | 0.08512100  | 2.43776900  |
| H | 2.67892700  | 0.70993800  | 2.41917300  |
| H | 3.09487800  | -0.65177600 | 3.48254800  |
| C | 1.51966900  | 1.46036500  | -0.19468900 |
| O | 0.97015300  | 0.65439500  | -0.97140300 |
| O | 0.93915800  | 2.11860100  | 0.71360900  |
| H | -0.17027300 | 1.96162300  | 0.75228400  |
| C | -1.96392800 | -0.35182900 | 0.33675900  |
| C | -2.30014700 | 1.04726200  | 0.45563900  |
| C | -3.67346900 | 1.40105100  | 0.19286800  |
| C | -4.61153500 | 0.46199200  | -0.19722600 |
| C | -4.28086900 | -0.95451400 | -0.36502100 |
| C | -2.88106800 | -1.30484100 | -0.08337800 |
| C | -5.96853300 | 0.84095900  | -0.46245400 |
| N | -7.05934200 | 1.15276300  | -0.67628200 |
| C | -4.02077500 | 2.78892400  | 0.32642500  |
| N | -4.30091100 | 3.90341900  | 0.43070700  |
| O | -5.10179200 | -1.79319200 | -0.72048400 |
| O | -1.46189400 | 1.94040900  | 0.76955200  |

|    |             |             |             |
|----|-------------|-------------|-------------|
| Cl | -2.45053100 | -2.93910000 | -0.27078800 |
| Cl | -0.36055700 | -0.79617700 | 0.70321000  |

**IM1b1**

|   |             |             |             |
|---|-------------|-------------|-------------|
| C | -0.63353000 | -0.59682400 | -0.07227700 |
| C | -1.17913600 | -1.85501600 | -0.34008500 |
| C | -2.56194900 | -2.05155700 | -0.36154600 |
| C | -3.43182900 | -0.98877800 | -0.12076800 |
| C | -2.91302400 | 0.27503600  | 0.14482000  |
| C | -1.52429000 | 0.46259700  | 0.18630700  |
| C | 0.84915500  | -0.39863500 | -0.09882200 |
| C | 1.60088200  | -0.59747400 | 1.07370800  |
| C | 2.98850100  | -0.43238800 | 1.01733600  |
| C | 3.61590500  | -0.07357300 | -0.17449700 |
| C | 2.86005000  | 0.12909400  | -1.32639300 |
| C | 1.46908600  | -0.02941000 | -1.30694200 |
| H | -0.50542900 | -2.69110500 | -0.54035900 |
| H | -2.96069700 | -3.04549300 | -0.57231500 |
| H | -4.51131000 | -1.14319700 | -0.13941500 |
| H | -3.57937200 | 1.11676500  | 0.34107100  |
| H | 3.57865800  | -0.58481100 | 1.92379900  |
| H | 4.69994100  | 0.05246200  | -0.20388800 |
| H | 3.34962800  | 0.41421500  | -2.26027800 |
| C | 0.65388200  | 0.19764800  | -2.55349800 |
| H | 0.08530400  | -0.70399800 | -2.82761100 |
| H | -0.08089400 | 1.00444200  | -2.40672600 |
| H | 1.29944200  | 0.47086200  | -3.39820400 |
| C | 0.91631300  | -0.95222900 | 2.36595000  |
| H | 0.20892200  | -0.15690900 | 2.64662900  |
| H | 0.33985600  | -1.88495900 | 2.27347500  |
| H | 1.64630700  | -1.07388400 | 3.17683600  |
| C | -0.99273200 | 1.82402400  | 0.50257100  |
| O | -0.16847800 | 2.12951600  | 1.32518900  |
| O | -1.56578000 | 2.71429800  | -0.27871500 |



**TS1b2**

|    |             |             |             |
|----|-------------|-------------|-------------|
| C  | -0.88868900 | 1.53271900  | 0.08161100  |
| C  | 0.55501900  | 1.25398600  | -0.01689300 |
| C  | 1.01898400  | -0.03509200 | -0.18874500 |
| C  | 0.15737300  | -1.20443000 | -0.18435000 |
| C  | -1.25593500 | -0.93072100 | -0.11046600 |
| C  | -1.75044100 | 0.35773900  | 0.00858900  |
| Cl | 2.68203100  | -0.33047700 | -0.45046100 |
| Cl | 1.59362400  | 2.59611900  | 0.04081600  |
| C  | -2.13102800 | -2.06719100 | -0.13009700 |
| C  | -3.15860900 | 0.60583700  | 0.09437100  |
| N  | -2.83724800 | -2.97996400 | -0.14498000 |
| N  | -4.29327100 | 0.80779200  | 0.16456700  |
| O  | -1.32246400 | 2.67324200  | 0.21152800  |
| O  | 0.61725300  | -2.37169800 | -0.19165000 |
| O  | 2.77280900  | -2.20995300 | 1.03302300  |
| H  | 3.50921800  | -2.66707000 | 0.57219900  |
| H  | 1.89744400  | -2.45345600 | 0.50733000  |

**IM1b2**

|   |            |            |             |
|---|------------|------------|-------------|
| O | 0.00000000 | 0.00000000 | 0.10890100  |
| H | 0.00000000 | 0.00000000 | -0.87121100 |

**TS2b2**

|   |             |             |             |
|---|-------------|-------------|-------------|
| C | -0.78951500 | 0.20598100  | -0.19097800 |
| C | -1.32587300 | -0.38006600 | -1.35376200 |
| C | -2.68835700 | -0.69342900 | -1.38042800 |
| C | -3.50179400 | -0.43008800 | -0.27967100 |
| C | -2.95943900 | 0.14953800  | 0.86630500  |
| C | -1.60141400 | 0.47454700  | 0.92838800  |
| C | 0.65563000  | 0.58898300  | -0.16042800 |
| C | 1.69074000  | -0.27758600 | 0.23771100  |
| C | 3.02336800  | 0.15498700  | 0.22365500  |
| C | 3.34429300  | 1.44647000  | -0.17644300 |
| C | 2.32628400  | 2.31502200  | -0.57175800 |
| C | 1.00077600  | 1.88629900  | -0.56393500 |
| H | -3.11208600 | -1.15013600 | -2.27762900 |
| H | -4.56444500 | -0.67816500 | -0.31466100 |
| H | -3.59510700 | 0.35299900  | 1.73105800  |
| H | 3.80043400  | -0.54358000 | 0.53510300  |
| H | 4.38461800  | 1.77485000  | -0.18003500 |
| H | 2.56419900  | 3.33206700  | -0.88859600 |
| H | 0.20615400  | 2.56673000  | -0.87780300 |
| C | -1.00641700 | 1.06874600  | 2.17639000  |
| H | -0.21660700 | 0.41408700  | 2.57693500  |
| H | -0.54095600 | 2.04551200  | 1.97552500  |
| H | -1.77205000 | 1.20161900  | 2.95183700  |
| C | -0.44306500 | -0.68234100 | -2.53493300 |
| H | 0.36244700  | -1.37939700 | -2.25458200 |
| H | -1.02164700 | -1.13459300 | -3.35086400 |
| H | 0.04232600  | 0.22911000  | -2.91554800 |
| C | 1.46864200  | -1.69591800 | 0.68749200  |
| O | 2.39059000  | -2.45082600 | 0.91530800  |
| O | 0.20077000  | -2.03658000 | 0.81502600  |
| H | 0.09765200  | -3.19306500 | 1.03771300  |
| O | 0.39999500  | -4.12580500 | 1.63536800  |
| H | 1.36915800  | -4.16258700 | 1.48552800  |

**IM1b3**

|   |             |             |             |
|---|-------------|-------------|-------------|
| C | -0.89799300 | -0.33916400 | 0.14362400  |
| C | -1.48962600 | 0.34235200  | 1.22322200  |
| C | -2.87580900 | 0.54258600  | 1.21329100  |
| C | -3.65645100 | 0.07917500  | 0.15585400  |
| C | -3.05658500 | -0.59288800 | -0.90895800 |
| C | -1.67462000 | -0.81207400 | -0.92966500 |
| C | 0.57409700  | -0.61064800 | 0.16722900  |
| C | 1.54883400  | 0.33853700  | -0.19638500 |
| C | 2.91217600  | 0.02967700  | -0.08620300 |
| C | 3.32066300  | -1.22365000 | 0.36052000  |
| C | 2.36181800  | -2.17184000 | 0.71881200  |
| C | 1.00584000  | -1.86133000 | 0.62751000  |
| H | -3.34424900 | 1.06784700  | 2.04898800  |
| H | -4.73610500 | 0.24266600  | 0.16064600  |
| H | -3.66591900 | -0.95078600 | -1.74226200 |
| H | 3.65438200  | 0.77740000  | -0.36735400 |
| H | 4.38421200  | -1.45712300 | 0.43078700  |
| H | 2.67014200  | -3.15638700 | 1.07590900  |
| H | 0.25712100  | -2.59923200 | 0.92461600  |
| C | -1.02591400 | -1.51761900 | -2.09155900 |
| H | -0.21982900 | -0.90311300 | -2.52161900 |
| H | -0.57252200 | -2.47180600 | -1.78125800 |
| H | -1.76002200 | -1.72788300 | -2.87994100 |
| C | -0.65287800 | 0.86336800  | 2.36337400  |
| H | -0.02072900 | 0.07226500  | 2.79450200  |
| H | 0.02265000  | 1.66709900  | 2.02718400  |
| H | -1.29050200 | 1.27016500  | 3.15879800  |
| C | 1.14814200  | 1.67766500  | -0.72548400 |
| O | 0.10310600  | 1.92563800  | -1.27441900 |
| O | 2.09437000  | 2.60769300  | -0.54831400 |
| H | 1.79140000  | 3.43736200  | -0.95821300 |

**IM2b1**

|   |             |             |             |
|---|-------------|-------------|-------------|
| C | 1.69382000  | 0.32026200  | 0.00008700  |
| C | 0.59471300  | -0.52318100 | 0.00001100  |
| C | 0.74990600  | -1.90452000 | -0.00002400 |
| C | 2.05407500  | -2.40488800 | 0.00001900  |
| C | 3.16664900  | -1.54903400 | 0.00009500  |
| C | 2.99983200  | -0.16543100 | 0.00013000  |
| C | 1.19783800  | 1.71743200  | 0.00011100  |
| H | -0.11302400 | -2.57400800 | -0.00008100 |
| H | 2.21367700  | -3.48462900 | -0.00000600 |
| H | 4.17120900  | -1.97464200 | 0.00012800  |
| H | 3.85303000  | 0.51524200  | 0.00019000  |
| O | 1.81045500  | 2.74706100  | 0.00016600  |
| O | -0.15392700 | 1.67541100  | 0.00004500  |
| C | -0.68055700 | 0.31790600  | -0.00002100 |
| C | -1.46537600 | 0.09411900  | -1.27404400 |
| C | -1.46549200 | 0.09404300  | 1.27391700  |
| C | -2.69133300 | -0.50939000 | -1.22574000 |
| C | -2.69144700 | -0.50946000 | 1.22546500  |
| C | -3.31224400 | -0.85372100 | -0.00017600 |
| H | -3.21290800 | -0.71140200 | -2.16443900 |
| H | -3.21310800 | -0.71152500 | 2.16410400  |
| H | -4.28842200 | -1.33846100 | -0.00023600 |
| C | -0.81260400 | 0.52439200  | 2.54868100  |
| H | -0.66554100 | 1.61620000  | 2.56099000  |
| H | -1.42699600 | 0.24626300  | 3.41462900  |
| H | 0.18454200  | 0.06796900  | 2.66710800  |
| C | -0.81236500 | 0.52452800  | -2.54872500 |
| H | -1.42665300 | 0.24639900  | -3.41474700 |
| H | -0.66534100 | 1.61634200  | -2.56098900 |
| H | 0.18481000  | 0.06814500  | -2.66705800 |

**IM3b1**

|   |             |             |             |
|---|-------------|-------------|-------------|
| C | 1.65928900  | 0.23378300  | 0.00007800  |
| C | 0.50212800  | -0.52874600 | -0.00001700 |
| C | 0.53698900  | -1.91466500 | -0.00009100 |
| C | 1.79802900  | -2.51488300 | -0.00007000 |
| C | 2.97409000  | -1.75086900 | 0.00002200  |
| C | 2.91979500  | -0.35925100 | 0.00009900  |
| C | 1.30027200  | 1.66812900  | 0.00014700  |
| H | -0.37855500 | -2.51070000 | -0.00015700 |
| H | 1.86674500  | -3.60371400 | -0.00012600 |
| H | 3.94052400  | -2.25632400 | 0.00003400  |
| H | 3.82254400  | 0.25367600  | 0.00016800  |
| O | 1.98045200  | 2.64445800  | 0.00022700  |
| O | -0.07166900 | 1.74371500  | 0.00009300  |
| C | -0.69140900 | 0.47616500  | -0.00000500 |
| C | -1.42274900 | 0.21050700  | -1.28246100 |
| C | -1.42282900 | 0.21033700  | 1.28237000  |
| C | -2.53293800 | -0.59385900 | -1.24185800 |
| C | -2.53300700 | -0.59403400 | 1.24159100  |
| C | -3.06202200 | -0.99476100 | -0.00017600 |
| H | -3.03909100 | -0.87636600 | -2.16489400 |
| H | -3.03920600 | -0.87668000 | 2.16456000  |
| H | -3.96265200 | -1.61388500 | -0.00024100 |
| C | -0.86385100 | 0.78333300  | -2.52573500 |
| H | -1.39647500 | 0.40936900  | -3.40639700 |
| H | -0.94834200 | 1.88185400  | -2.47713400 |
| H | 0.21132500  | 0.55627800  | -2.61507000 |
| C | -0.86398000 | 0.78295800  | 2.52575900  |
| H | -0.94858100 | 1.88148000  | 2.47738200  |
| H | -1.39656700 | 0.40876700  | 3.40634700  |
| H | 0.21121800  | 0.55599100  | 2.61504700  |

**IM4b1**

|   |             |             |             |
|---|-------------|-------------|-------------|
| C | 1.94550100  | 0.06022200  | 0.00091400  |
| C | 0.63920100  | 0.51929900  | -0.00743100 |
| C | 0.34526400  | 1.87811400  | -0.01898000 |
| C | 1.42564700  | 2.76212100  | -0.02234900 |
| C | 2.75186500  | 2.29870800  | -0.01395200 |
| C | 3.03216100  | 0.93377900  | -0.00218700 |
| C | 1.90500700  | -1.42221900 | 0.01408100  |
| H | -0.69314500 | 2.22257800  | -0.02621800 |
| H | 1.23866700  | 3.83747700  | -0.03148100 |
| H | 3.57077000  | 3.01965000  | -0.01664300 |
| H | 4.05718000  | 0.55899000  | 0.00461800  |
| O | 2.80060100  | -2.21628900 | 0.02393200  |
| O | 0.60118300  | -1.79835600 | 0.01401200  |
| C | -0.30131900 | -0.67514600 | 0.00251500  |
| C | -1.12464000 | -0.66466400 | 1.27712300  |
| C | -1.12384900 | -0.68966200 | -1.27278800 |
| C | -2.38356700 | -0.21880400 | 1.24413800  |
| C | -2.38157400 | -0.24078300 | -1.25406300 |
| C | -3.07987800 | 0.22693800  | -0.01155400 |
| H | -2.94872700 | -0.14113600 | 2.17885200  |
| H | -2.94323100 | -0.17308800 | -2.19035300 |
| H | -4.10221300 | -0.19307800 | -0.01107000 |
| O | -3.16503800 | 1.64965700  | -0.08207400 |
| H | -3.65818000 | 1.95490300  | 0.69356400  |
| C | -0.41361800 | -1.14150600 | -2.51297100 |
| H | -0.16836800 | -2.21218400 | -2.45205500 |
| H | -1.03672200 | -0.97096700 | -3.40005800 |
| H | 0.53777200  | -0.59998500 | -2.64281300 |
| C | -0.41531900 | -1.08924600 | 2.52749600  |
| H | -1.04011300 | -0.90219700 | 3.41007100  |
| H | -0.16786700 | -2.16048600 | 2.48864100  |
| H | 0.53492600  | -0.54348200 | 2.64804400  |

**OH<sup>-</sup>**

|   |            |            |             |
|---|------------|------------|-------------|
| O | 0.00000000 | 0.00000000 | 0.10841500  |
| H | 0.00000000 | 0.00000000 | -0.86731900 |



**TS2b1**

|    |             |             |             |
|----|-------------|-------------|-------------|
| C  | -3.50749000 | -1.27707800 | 0.57097100  |
| C  | -2.63582200 | -0.48923700 | -0.16988200 |
| C  | -2.13818400 | -0.92656100 | -1.38994400 |
| C  | -2.53449600 | -2.19419700 | -1.82775700 |
| C  | -3.39854500 | -2.99667100 | -1.06940000 |
| C  | -3.90331700 | -2.54334600 | 0.14922300  |
| C  | -3.92733000 | -0.50774400 | 1.76109700  |
| H  | -1.46180400 | -0.31287400 | -1.98621700 |
| H  | -2.16185800 | -2.56813200 | -2.78366700 |
| H  | -3.68585900 | -3.98069800 | -1.44320300 |
| H  | -4.58903300 | -3.14677000 | 0.74649700  |
| O  | -4.66091600 | -0.80475400 | 2.66090200  |
| O  | -3.32809000 | 0.70995100  | 1.69607500  |
| C  | -2.44988800 | 0.83721900  | 0.55817800  |
| C  | -1.04474200 | 1.04598300  | 1.10655700  |
| C  | -2.97319500 | 1.96669000  | -0.30472700 |
| C  | -0.30699900 | 2.10100900  | 0.74303200  |
| C  | -2.15143100 | 2.96479700  | -0.74363000 |
| C  | -0.70986200 | 3.05915200  | -0.33313300 |
| H  | 0.67911800  | 2.24402100  | 1.19333000  |
| H  | -2.52521100 | 3.73783600  | -1.41622200 |
| H  | -0.40445000 | 4.09612800  | -0.13307200 |
| O  | -0.29057900 | 2.65799800  | -1.60793500 |
| H  | 0.25691700  | 1.57159200  | -1.67140000 |
| C  | -4.43371800 | 1.98914400  | -0.59067000 |
| H  | -4.99549500 | 2.16517500  | 0.34034300  |
| H  | -4.68148900 | 2.77514500  | -1.31234700 |
| H  | -4.76243100 | 1.01238200  | -0.98241600 |
| C  | -0.55694900 | 0.01303200  | 2.07805400  |
| H  | 0.45605600  | 0.25845600  | 2.42159300  |
| H  | -1.21792200 | -0.05780900 | 2.95469900  |
| H  | -0.53338100 | -0.98139400 | 1.60303800  |
| C  | 2.98562000  | -1.67246100 | 0.07468800  |
| C  | 3.91665100  | -0.74063500 | 0.73282200  |
| C  | 3.71538900  | 0.66625200  | 0.40711800  |
| C  | 2.70407800  | 1.09167400  | -0.44500100 |
| C  | 1.77512800  | 0.16755300  | -1.02408600 |
| C  | 1.99433000  | -1.24248800 | -0.75997300 |
| Cl | 0.92348700  | -2.34544600 | -1.52716600 |
| Cl | 3.22038400  | -3.33566600 | 0.41220300  |
| O  | 0.79555300  | 0.51785400  | -1.76061700 |
| O  | 4.80472000  | -1.11817800 | 1.49260500  |
| C  | 2.57830300  | 2.48244900  | -0.77178800 |

|   |            |            |             |
|---|------------|------------|-------------|
| N | 2.47763700 | 3.60372200 | -1.02921900 |
| C | 4.62659400 | 1.59897800 | 0.99565800  |
| N | 5.36104500 | 2.35368000 | 1.47075300  |

**IM5b1**

|   |             |             |             |
|---|-------------|-------------|-------------|
| C | 1.91436100  | -0.01065700 | 0.01770100  |
| C | 0.63551300  | 0.52107900  | -0.00877700 |
| C | 0.42260600  | 1.89453600  | -0.03216400 |
| C | 1.55229100  | 2.71520100  | -0.02386900 |
| C | 2.84898500  | 2.17687300  | 0.00600800  |
| C | 3.04935000  | 0.79824200  | 0.02645700  |
| C | 1.79444500  | -1.48822800 | 0.02725800  |
| H | -0.59076400 | 2.30369400  | -0.05809700 |
| H | 1.42597300  | 3.79916800  | -0.04158400 |
| H | 3.70769200  | 2.84975200  | 0.01177600  |
| H | 4.05056100  | 0.36436700  | 0.04777200  |
| O | 2.64423800  | -2.33009200 | 0.04838100  |
| O | 0.47140800  | -1.79258700 | 0.00536500  |
| C | -0.36762900 | -0.62297400 | -0.01342100 |
| C | -1.20365800 | -0.58976800 | 1.25378200  |
| C | -1.18009000 | -0.60283200 | -1.29552200 |
| C | -2.44883600 | -0.10457000 | 1.23030900  |
| C | -2.42277500 | -0.11284800 | -1.28633300 |
| C | -3.10635900 | 0.39189300  | -0.04475900 |
| H | -3.02880600 | -0.00847300 | 2.15040700  |
| H | -2.97936600 | -0.03815200 | -2.22478400 |
| H | -4.16651300 | 0.07532300  | -0.02787500 |
| O | -3.03121700 | 1.76443500  | 0.10149600  |
| C | -0.47701100 | -1.08341300 | -2.52875800 |
| H | -0.27110100 | -2.16183600 | -2.46206500 |
| H | -1.08650100 | -0.89279600 | -3.42095900 |
| H | 0.49403800  | -0.57629100 | -2.65163700 |
| C | -0.53768700 | -1.08387400 | 2.50152600  |
| H | -1.16232900 | -0.88333600 | 3.38065000  |
| H | -0.34826900 | -2.16513400 | 2.43554900  |
| H | 0.43892000  | -0.59229900 | 2.64227700  |

**TS3b1**

|   |             |             |             |
|---|-------------|-------------|-------------|
| C | 5.15461300  | 0.08141500  | 0.63682900  |
| C | 3.80615100  | -0.20667900 | 0.76744800  |
| C | 3.28370300  | -0.71781700 | 1.94850400  |
| C | 4.17672000  | -0.93056200 | 3.00087100  |
| C | 5.54402200  | -0.64044100 | 2.86981400  |
| C | 6.05547700  | -0.12696600 | 1.67933000  |
| C | 5.37933500  | 0.60554100  | -0.73136600 |
| H | 2.21833100  | -0.94145400 | 2.04474600  |
| H | 3.80504200  | -1.33058200 | 3.94590000  |
| H | 6.21240600  | -0.82061800 | 3.71302300  |
| H | 7.11579300  | 0.10329600  | 1.56225800  |
| O | 6.38518600  | 0.97410500  | -1.26157900 |
| O | 4.17736400  | 0.61458500  | -1.37009400 |
| C | 3.10743900  | 0.13220300  | -0.54216100 |
| C | 2.52141100  | -1.12638200 | -1.15450400 |
| C | 2.10708400  | 1.24835200  | -0.31043800 |
| C | 1.20832500  | -1.37179600 | -1.07926100 |
| C | 0.79595700  | 0.98689200  | -0.23070700 |
| C | 0.23457700  | -0.36593300 | -0.55805900 |
| H | 0.79234500  | -2.31575500 | -1.43848900 |
| H | 0.07708200  | 1.76815900  | 0.02717500  |
| H | -0.55302900 | -0.11432800 | -1.48485200 |
| O | -0.52854400 | -0.77626700 | 0.46053700  |
| C | 2.67090200  | 2.62133900  | -0.11815800 |
| H | 3.12970400  | 2.97501700  | -1.05339900 |
| H | 1.88616500  | 3.32590400  | 0.18275900  |
| H | 3.46116100  | 2.61502200  | 0.64991300  |
| C | 3.50057100  | -2.08576500 | -1.75712900 |
| H | 3.00496500  | -3.02471600 | -2.03238100 |
| H | 3.95610800  | -1.64580700 | -2.65682700 |
| H | 4.31836300  | -2.30630800 | -1.05265100 |
| C | -4.70755800 | 0.15356700  | 0.84358500  |
| C | -4.15854500 | 1.37780900  | 0.42541000  |
| C | -3.13821600 | 1.41073600  | -0.53669900 |
| C | -2.65301000 | 0.22309500  | -1.14821200 |
| C | -3.20306200 | -1.01236700 | -0.67299300 |
| C | -4.20407900 | -1.04267300 | 0.28242900  |
| C | -4.65939800 | 2.58793300  | 1.01060400  |
| N | -5.05511000 | 3.56748000  | 1.47508400  |
| C | -2.55798900 | 2.65377600  | -0.95259700 |
| N | -2.07762300 | 3.65236600  | -1.27702200 |
| O | -1.75220200 | 0.25465700  | -2.06200600 |
| O | -5.66877600 | 0.18086100  | 1.75453900  |

|    |             |             |             |
|----|-------------|-------------|-------------|
| H  | -5.98887300 | -0.71352800 | 1.96821800  |
| Cl | -4.86824900 | -2.53345200 | 0.84397700  |
| Cl | -2.54335300 | -2.45645500 | -1.31269700 |

**P2**

|   |             |             |             |
|---|-------------|-------------|-------------|
| C | -1.95238000 | -0.08651900 | 0.00000400  |
| C | -0.71763700 | 0.54192100  | -0.00001300 |
| C | -0.61220500 | 1.92691000  | -0.00003100 |
| C | -1.80216200 | 2.65801600  | -0.00003600 |
| C | -3.05333100 | 2.02226700  | -0.00001800 |
| C | -3.14625600 | 0.63205200  | 0.00000300  |
| C | -1.72416700 | -1.55050600 | 0.00001300  |
| H | 0.36004900  | 2.42481800  | -0.00004000 |
| H | -1.75920200 | 3.74849900  | -0.00004900 |
| H | -3.96102000 | 2.62745000  | -0.00001800 |
| H | -4.10993700 | 0.11994900  | 0.00001500  |
| O | -2.50588600 | -2.45452000 | 0.00000900  |
| O | -0.37857200 | -1.75545700 | 0.00001900  |
| C | 0.36814700  | -0.52983500 | 0.00000000  |
| C | 1.17176000  | -0.42700300 | -1.28300800 |
| C | 1.17173700  | -0.42696200 | 1.28302000  |
| C | 2.40780800  | 0.09361500  | -1.25877500 |
| C | 2.40777900  | 0.09366600  | 1.25878700  |
| C | 3.08828700  | 0.46478400  | 0.00000700  |
| H | 2.97332900  | 0.24616300  | -2.18102400 |
| H | 2.97330200  | 0.24626400  | 2.18102600  |
| O | 4.17724600  | 1.00869700  | 0.00001300  |
| C | 0.48045600  | -0.86427000 | 2.53460800  |
| H | 0.29882600  | -1.94919800 | 2.50467300  |
| H | 1.08832300  | -0.62815600 | 3.41631400  |
| H | -0.50160000 | -0.37548400 | 2.63784900  |
| C | 0.48049200  | -0.86431700 | -2.53460300 |
| H | 1.08838100  | -0.62822800 | -3.41630100 |
| H | 0.29883600  | -1.94924000 | -2.50465900 |
| H | -0.50155100 | -0.37550700 | -2.63786800 |

### System 3

#### R4

|    |             |             |             |
|----|-------------|-------------|-------------|
| C  | 1.44728300  | 0.03013200  | -0.00000900 |
| C  | 0.38425300  | -0.87036700 | -0.00001500 |
| C  | -0.91924000 | -0.38083900 | 0.00000100  |
| C  | -1.14575000 | 0.99664100  | -0.00002000 |
| C  | -0.08042500 | 1.88669900  | -0.00001400 |
| C  | 1.22627600  | 1.40615900  | 0.00001400  |
| H  | 0.56117200  | -1.94497300 | -0.00001100 |
| H  | -0.29417200 | 2.95576400  | -0.00001000 |
| H  | 2.07364700  | 2.09062500  | 0.00002700  |
| F  | -2.38823800 | 1.45612000  | 0.00001300  |
| Cl | -2.26794800 | -1.45775400 | 0.00000300  |
| Cl | 3.07260200  | -0.57854300 | 0.00000500  |

**<sup>3</sup>DDQ\***

|    |             |             |             |
|----|-------------|-------------|-------------|
| C  | 1.34878500  | -0.68459500 | -0.01183100 |
| C  | 1.34878800  | 0.68618500  | 0.01173800  |
| C  | 0.11887600  | 1.49299400  | 0.00884900  |
| C  | -1.12022800 | 0.73426000  | -0.01852600 |
| C  | -1.12020900 | -0.73245000 | 0.01883600  |
| C  | 0.11890800  | -1.49120800 | -0.00872200 |
| C  | 2.57910400  | 1.42744700  | 0.03097600  |
| C  | 2.57934400  | -1.42621400 | -0.03096500 |
| N  | 3.54794300  | 2.01382100  | 0.04853900  |
| N  | 3.56591900  | -2.02373900 | -0.04863300 |
| Cl | -2.55773200 | 1.57452400  | -0.11441500 |
| Cl | -2.55769500 | -1.57269700 | 0.11499800  |
| O  | 0.13123400  | 2.72282900  | 0.01043300  |
| O  | 0.13127600  | -2.72115600 | -0.01027600 |



**IM1c1**

|    |             |             |             |
|----|-------------|-------------|-------------|
| C  | -0.36863600 | -0.92207300 | 0.00000400  |
| C  | -1.44538700 | -0.01566300 | 0.00001000  |
| C  | -1.24011400 | 1.41002600  | 0.00000600  |
| C  | 0.03321000  | 1.91391700  | 0.00000000  |
| C  | 1.11356700  | 1.00968600  | 0.00000000  |
| C  | 0.91706200  | -0.42254300 | -0.00000200 |
| H  | -0.54692500 | -1.99795700 | 0.00000400  |
| H  | -2.11156600 | 2.06685500  | 0.00000700  |
| H  | 0.24361800  | 2.98471700  | -0.00000400 |
| F  | 2.31736300  | 1.45633800  | -0.00001300 |
| Cl | 2.28450500  | -1.40829900 | -0.00001000 |
| Cl | -3.01977600 | -0.59174600 | 0.00001000  |

**DDQ<sup>-</sup>**

|    |             |             |             |
|----|-------------|-------------|-------------|
| C  | -0.13366800 | -1.48585700 | -0.00002300 |
| C  | -1.35734100 | -0.69806000 | -0.00001200 |
| C  | -1.35734000 | 0.69806200  | -0.00001300 |
| C  | -0.13366800 | 1.48585700  | -0.00004700 |
| C  | 1.10742000  | 0.67983400  | -0.00001000 |
| C  | 1.10742000  | -0.67983400 | -0.00000300 |
| C  | -2.58510000 | 1.43670800  | 0.00000500  |
| C  | -2.58510100 | -1.43670500 | -0.00000100 |
| N  | -3.57846600 | 2.02920300  | 0.00003500  |
| N  | -3.57846400 | -2.02920500 | 0.00000400  |
| Cl | 2.57623300  | 1.58758400  | 0.00000500  |
| Cl | 2.57623300  | -1.58758500 | 0.00001500  |
| O  | -0.11682200 | 2.71456100  | 0.00000200  |
| O  | -0.11682300 | -2.71456200 | 0.00000000  |

**R5**

|   |             |             |             |
|---|-------------|-------------|-------------|
| C | -0.04649800 | 0.65091700  | 0.00000000  |
| H | -1.09328700 | 0.98356800  | 0.00000000  |
| H | 0.43902300  | 1.08177600  | 0.89458800  |
| H | 0.43902300  | 1.08177600  | -0.89458800 |
| O | -0.04649800 | -0.74990100 | 0.00000000  |
| H | 0.86622000  | -1.05341400 | 0.00000000  |

**TS1c1**

|    |             |             |             |
|----|-------------|-------------|-------------|
| C  | -0.09095500 | -1.10335100 | -0.55592000 |
| C  | -1.38519600 | -0.55957000 | -0.34393500 |
| C  | -1.58052500 | 0.78775800  | -0.04652500 |
| C  | -0.46893100 | 1.73222800  | 0.05725700  |
| C  | 0.85434300  | 1.13061000  | -0.18766300 |
| C  | 1.01474100  | -0.18857800 | -0.51160900 |
| C  | -2.89306000 | 1.31392200  | 0.17482800  |
| C  | -2.49744200 | -1.46771000 | -0.42831800 |
| N  | -3.95503400 | 1.73792300  | 0.34822800  |
| N  | -3.40078800 | -2.18370200 | -0.49905200 |
| Cl | 2.20007800  | 2.20180500  | -0.06024500 |
| Cl | 2.57854600  | -0.86119700 | -0.80188400 |
| O  | -0.61933400 | 2.91960600  | 0.32207100  |
| O  | 0.06698000  | -2.36602800 | -0.94316000 |
| C  | 1.35936600  | -1.64272900 | 2.23021700  |
| H  | 1.52206700  | -0.54485500 | 2.07977500  |
| H  | 1.06959400  | -1.76114000 | 3.29728100  |
| H  | 2.36796600  | -2.09696000 | 2.10191500  |
| O  | 0.42834500  | -2.12360000 | 1.36441700  |
| H  | 0.41254200  | -2.72224500 | -0.04362000 |

**DDQH<sup>-</sup>**

|    |             |             |             |
|----|-------------|-------------|-------------|
| C  | -0.11403600 | 1.37178900  | 0.00004900  |
| C  | -1.34850400 | 0.67007200  | 0.00003900  |
| C  | -1.37158300 | -0.71432200 | 0.00005300  |
| C  | -0.14009100 | -1.50491900 | 0.00015600  |
| C  | 1.11224900  | -0.73040900 | 0.00003200  |
| C  | 1.11181600  | 0.64127300  | 0.00002200  |
| C  | -2.56235200 | 1.43866800  | -0.00000300 |
| N  | -3.54076300 | 2.04893700  | -0.00004100 |
| C  | -2.60434600 | -1.44108100 | -0.00000700 |
| N  | -3.59671600 | -2.03081600 | -0.00003200 |
| O  | -0.15261500 | -2.73044100 | -0.00004800 |
| O  | -0.16911100 | 2.68124000  | 0.00002300  |
| H  | 0.70905600  | 3.10826300  | 0.00000500  |
| Cl | 2.57422500  | 1.55214200  | -0.00004500 |
| Cl | 2.56272700  | -1.62437200 | -0.00003400 |

**IM2c1(IM1c2)**

|   |             |             |             |
|---|-------------|-------------|-------------|
| C | 0.56970900  | -0.00008100 | 0.01292500  |
| H | 0.86984900  | 0.00308600  | -1.05844300 |
| H | 1.01155300  | -0.91227100 | 0.45593400  |
| H | 1.01137600  | 0.90988200  | 0.46073000  |
| O | -0.78887900 | -0.00002700 | 0.00802900  |

**TS2cc1**

|    |             |             |             |
|----|-------------|-------------|-------------|
| C  | 0.65712600  | -1.09607700 | 2.07185100  |
| H  | 0.70954500  | -0.03593100 | 2.38659000  |
| H  | 0.97277000  | -1.72790000 | 2.92399600  |
| H  | -0.40252100 | -1.36153200 | 1.87184800  |
| O  | 1.48470800  | -1.40327300 | 1.01996600  |
| C  | -1.64113900 | 0.08746300  | -0.23403400 |
| C  | -0.64172300 | 1.03801900  | 0.00161500  |
| C  | 0.67530300  | 0.71313300  | -0.27020100 |
| C  | 1.01819900  | -0.60050000 | -0.68779000 |
| C  | -0.01974500 | -1.50239700 | -1.02230600 |
| C  | -1.33457300 | -1.17990100 | -0.74976000 |
| H  | -0.89315100 | 2.02637600  | 0.38493200  |
| H  | 0.26704700  | -2.46905000 | -1.43597400 |
| H  | -2.13903500 | -1.88705600 | -0.94920000 |
| F  | 2.22280000  | -0.81279000 | -1.18209700 |
| Cl | 1.95216600  | 1.81685300  | 0.04299200  |
| Cl | -3.28617800 | 0.49126100  | 0.11234400  |

**IM3c1**

|    |             |             |             |
|----|-------------|-------------|-------------|
| C  | -1.87187700 | -0.06574400 | -0.02707000 |
| C  | -1.50029100 | -1.40687900 | 0.27320500  |
| C  | -0.19587500 | -1.72786400 | 0.44505000  |
| C  | 0.92855500  | -0.75255900 | 0.24551300  |
| C  | 0.41262200  | 0.66756600  | 0.11701500  |
| C  | -0.90701300 | 0.96423800  | -0.06479700 |
| H  | -2.28171200 | -2.16047700 | 0.37128200  |
| H  | 0.12482000  | -2.74488900 | 0.67475600  |
| H  | -1.22123400 | 1.99928500  | -0.19653600 |
| F  | 1.76320200  | -0.79433200 | 1.34418300  |
| O  | 1.63159400  | -1.21677300 | -0.84919500 |
| C  | 2.83230900  | -0.56244900 | -1.21820200 |
| H  | 3.39273400  | -1.27626700 | -1.83331300 |
| H  | 2.63242000  | 0.34340400  | -1.81033700 |
| H  | 3.42826700  | -0.29592200 | -0.33415100 |
| Cl | 1.57445700  | 1.93541300  | 0.24165700  |
| Cl | -3.52666000 | 0.31871600  | -0.28872000 |



**R5+ DDQ<sup>-</sup>**

|    |             |             |             |
|----|-------------|-------------|-------------|
| C  | -0.13327800 | 1.47843700  | 0.00074000  |
| C  | -1.35753800 | 0.69732400  | 0.00035600  |
| C  | -1.35753800 | -0.69732400 | 0.00036500  |
| C  | -0.13327800 | -1.47843700 | 0.00078200  |
| C  | 1.11069000  | -0.68003700 | 0.00017800  |
| C  | 1.11069000  | 0.68003700  | 0.00017100  |
| C  | -2.58328500 | -1.43428600 | -0.00000200 |
| C  | -2.58328500 | 1.43428600  | -0.00000200 |
| N  | -3.57777400 | -2.02495800 | -0.00025800 |
| N  | -3.57777500 | 2.02495700  | -0.00025800 |
| Cl | 2.57753200  | -1.58573200 | -0.00033800 |
| Cl | 2.57753200  | 1.58573200  | -0.00034500 |
| O  | -0.12414400 | -2.71040000 | -0.00003900 |
| O  | -0.12414400 | 2.71040000  | 0.00000000  |
| C  | 0.29957687  | -2.59400017 | 3.90650331  |
| H  | 0.47117035  | -3.09047911 | 4.87086019  |
| H  | 1.03639978  | -1.77996282 | 3.80207118  |
| H  | -0.71152387 | -2.15360951 | 3.92072498  |
| O  | 0.43926860  | -3.56866480 | 2.89507578  |
| H  | 0.29189504  | -3.15143138 | 2.03796156  |

**IM2c1+R4**

|    |             |             |             |
|----|-------------|-------------|-------------|
| C  | -2.44983934 | 2.54808166  | 1.30990004  |
| C  | -2.36956339 | 3.42904145  | 0.20927300  |
| C  | -2.22430548 | 2.96903121  | -1.14261011 |
| C  | -2.15949541 | 1.62603046  | -1.39147491 |
| C  | -2.23892924 | 0.74127451  | -0.29833343 |
| C  | -2.38472884 | 1.20131510  | 1.05909513  |
| H  | -2.56013490 | 2.92790170  | 2.32690312  |
| H  | -2.16758865 | 3.69709144  | -1.95313479 |
| H  | -2.04944583 | 1.21738985  | -2.39694938 |
| F  | -2.18066353 | -0.53095720 | -0.50186798 |
| Cl | -2.46986133 | 0.03658996  | 2.29800534  |
| Cl | -2.44627515 | 5.09156788  | 0.48115698  |
| C  | 0.93087459  | 1.19590662  | -0.08631415 |
| H  | 1.46539104  | 0.78064011  | 0.82246819  |
| H  | 1.03279296  | 2.31582976  | 0.05122961  |
| H  | 1.65679093  | 0.97712701  | -0.92820652 |
| O  | -0.31978466 | 0.75022399  | -0.27304720 |

**TS1c2**

|    |             |             |             |
|----|-------------|-------------|-------------|
| C  | -1.90308800 | -1.10751500 | 0.69094100  |
| C  | -2.49347800 | -0.90940500 | -0.62998600 |
| C  | -2.93119500 | 0.43251700  | -0.93329600 |
| C  | -2.71218300 | 1.49247300  | -0.06999500 |
| C  | -2.03729000 | 1.33528700  | 1.21248500  |
| C  | -1.66240000 | -0.04598300 | 1.55819000  |
| C  | -3.12119900 | 2.82180100  | -0.41343600 |
| C  | -3.55192700 | 0.63191100  | -2.21128500 |
| N  | -3.45025100 | 3.89373900  | -0.68955600 |
| N  | -4.05385000 | 0.79383100  | -3.23818100 |
| Cl | -0.96219200 | -0.28726100 | 3.08563000  |
| Cl | -1.57459100 | -2.72098900 | 1.14450300  |
| O  | -1.80928400 | 2.27931000  | 1.96713000  |
| O  | -2.52121300 | -1.83316300 | -1.47384000 |
| C  | 0.43801102  | -1.25889621 | -1.17855677 |
| H  | -0.03780202 | -0.82273479 | -0.32517223 |
| H  | 0.12448752  | -0.47080184 | -1.83086827 |
| O  | -0.05700598 | -2.50043021 | -1.33674077 |
| H  | -1.04495198 | -2.44861421 | -1.54500177 |
| H  | 1.14507393  | -1.05996878 | -0.40048870 |

**DDQH**

|    |             |             |             |
|----|-------------|-------------|-------------|
| C  | 1.10692300  | 0.63698100  | -0.00008900 |
| C  | -0.11629000 | 1.36524200  | 0.00001800  |
| C  | -1.35180900 | 0.66805600  | -0.00002100 |
| C  | -1.37351200 | -0.71956100 | 0.00003500  |
| C  | -0.13950100 | -1.51307500 | -0.00006300 |
| C  | 1.11537800  | -0.73689200 | 0.00006900  |
| O  | -0.14716700 | -2.73464300 | -0.00046300 |
| O  | -0.15252300 | 2.68227700  | 0.00006200  |
| H  | 0.74634700  | 3.05080400  | 0.00025700  |
| Cl | 2.56246500  | -1.62487800 | 0.00018800  |
| Cl | 2.56914300  | 1.55847700  | -0.00008400 |
| C  | -2.60858600 | -1.44073900 | 0.00010100  |
| C  | -2.56410900 | 1.44005700  | -0.00002000 |
| N  | -3.60731800 | -2.02011400 | 0.00020000  |
| N  | -3.53512800 | 2.06247400  | -0.00005500 |

**TS1c3**

|    |             |             |             |
|----|-------------|-------------|-------------|
| C  | -1.47622700 | -1.43766900 | 0.05525200  |
| C  | -1.90648000 | -0.08217100 | -0.05929800 |
| C  | -0.97646700 | 0.98235800  | -0.05830700 |
| C  | 0.36193700  | 0.71071100  | 0.05022000  |
| C  | 0.82325000  | -0.66121400 | 0.22905300  |
| C  | -0.14969900 | -1.72481600 | 0.16772800  |
| H  | -2.22175400 | -2.23315000 | 0.02770200  |
| H  | -1.32087700 | 2.01362800  | -0.14442400 |
| H  | 0.22210900  | -2.74792400 | 0.23790300  |
| F  | 1.58125800  | -0.68291400 | 1.70499700  |
| C  | 2.61040300  | -0.69442300 | -1.57848000 |
| H  | 3.56353200  | -1.22253600 | -1.67162900 |
| H  | 2.73661600  | 0.38743200  | -1.68752700 |
| H  | 1.87987000  | -1.09760600 | -2.28863700 |
| O  | 2.12658400  | -1.00653100 | -0.24589700 |
| H  | 2.45312900  | -0.86178600 | 0.85588200  |
| Cl | 1.53844400  | 1.94858800  | 0.11697700  |
| Cl | -3.55473300 | 0.25163300  | -0.20780600 |

**HF**

|   |             |            |            |
|---|-------------|------------|------------|
| F | -0.24760383 | 0.06389776 | 0.00000000 |
| H | -1.12760383 | 0.06389776 | 0.00000000 |

**IM1c3**

|    |             |             |             |
|----|-------------|-------------|-------------|
| C  | -1.71309700 | -0.19768400 | 0.00001300  |
| C  | -0.91757900 | 0.96013600  | -0.00001300 |
| C  | 0.45493100  | 0.83141900  | -0.00001700 |
| C  | 1.06453800  | -0.48968400 | 0.00000700  |
| C  | 0.23027600  | -1.64706700 | 0.00003400  |
| C  | -1.12955500 | -1.50340500 | 0.00003700  |
| H  | -1.37722600 | 1.94878500  | -0.00003100 |
| H  | 0.67547800  | -2.64144900 | 0.00005300  |
| H  | -1.78685800 | -2.37374600 | 0.00005700  |
| O  | 2.35384400  | -0.52018900 | 0.00000100  |
| C  | 3.09447600  | -1.75135400 | 0.00001700  |
| H  | 4.14682500  | -1.45800500 | 0.00000000  |
| H  | 2.85581300  | -2.32276500 | 0.90658900  |
| H  | 2.85579400  | -2.32280000 | -0.90652800 |
| Cl | 1.46978700  | 2.18461900  | -0.00005200 |
| Cl | -3.39358300 | -0.06007000 | 0.00001600  |

**DDQ**

|    |             |             |             |
|----|-------------|-------------|-------------|
| C  | 1.15594600  | -0.67373300 | 0.00002000  |
| C  | -0.11818900 | -1.45820900 | 0.00025000  |
| C  | -1.40257400 | -0.67387400 | 0.00004700  |
| C  | -1.40257400 | 0.67387400  | -0.00000700 |
| C  | -0.11818900 | 1.45820900  | 0.00013200  |
| C  | 1.15594600  | 0.67373300  | -0.00001400 |
| O  | -0.13684500 | 2.65830000  | 0.00054500  |
| O  | -0.13684500 | -2.65830000 | 0.00022100  |
| Cl | 2.58976800  | 1.60062000  | -0.00018400 |
| Cl | 2.58976700  | -1.60062000 | -0.00014400 |
| C  | -2.61258400 | 1.44865700  | -0.00011100 |
| C  | -2.61258400 | -1.44865700 | -0.00004500 |
| N  | -3.58098300 | 2.07389500  | -0.00021100 |
| N  | -3.58098300 | -2.07389500 | -0.00010200 |



**TS4c1**

|    |             |             |             |
|----|-------------|-------------|-------------|
| C  | 2.42235000  | -0.22451500 | 0.08032700  |
| C  | 1.70378700  | 0.97490500  | 0.10434400  |
| C  | 0.39719800  | 0.97878000  | -0.34300800 |
| C  | -0.21964900 | -0.21803800 | -0.81721400 |
| C  | 0.53430500  | -1.42151600 | -0.80041300 |
| C  | 1.84257600  | -1.41980100 | -0.36812900 |
| H  | 2.16058000  | 1.89160800  | 0.47467900  |
| H  | 2.42287400  | -2.34138100 | -0.34958500 |
| O  | -1.42811700 | -0.09878700 | -1.30948200 |
| C  | -2.22278500 | -1.24890000 | -1.56901000 |
| H  | -3.17063800 | -0.87057400 | -1.96276700 |
| H  | -1.74135900 | -1.89108400 | -2.32005400 |
| H  | -2.38982300 | -1.78600100 | -0.62220500 |
| H  | 0.06306900  | -2.35209200 | -1.10948600 |
| F  | -1.10936200 | -1.03150800 | 1.15531400  |
| C  | -3.65869700 | 0.34952900  | 1.08901900  |
| H  | -3.46740300 | 1.09327100  | 1.88700600  |
| H  | -2.99650500 | 0.64943100  | 0.23709800  |
| H  | -4.70022700 | 0.43894700  | 0.73924600  |
| O  | -3.39009000 | -0.93716600 | 1.48635100  |
| H  | -2.30035400 | -1.04177300 | 1.50670800  |
| Cl | -0.53715400 | 2.41774100  | -0.31007500 |
| Cl | 4.05804800  | -0.23196600 | 0.63072700  |

**TS3c1-1**

|    |             |             |             |
|----|-------------|-------------|-------------|
| C  | 1.78928700  | -0.18108900 | -0.13088200 |
| C  | 1.02881500  | 1.00210000  | 0.00107800  |
| C  | -0.34067200 | 0.94418900  | -0.07240500 |
| C  | -1.01010100 | -0.30430200 | -0.25888400 |
| C  | -0.21258600 | -1.47808900 | -0.36952100 |
| C  | 1.18439700  | -1.40604400 | -0.32713400 |
| H  | 1.52641800  | 1.95852300  | 0.15528300  |
| H  | -0.69496600 | -2.43439500 | -0.55755900 |
| H  | 1.78571000  | -2.30842000 | -0.42409500 |
| F  | -0.94018800 | -1.29167800 | 1.58705800  |
| O  | -2.31455100 | -0.26339000 | -0.42439500 |
| C  | -3.04334300 | -1.47865000 | -0.40420500 |
| H  | -4.10092700 | -1.19869500 | -0.38401300 |
| H  | -2.84175500 | -2.06996600 | -1.31093700 |
| H  | -2.77190000 | -2.04074000 | 0.49845700  |
| Cl | -1.29394800 | 2.37049500  | 0.07146500  |
| Cl | 3.51163800  | -0.06242300 | -0.04168800 |

**IM4c1-1**

|    |             |             |             |
|----|-------------|-------------|-------------|
| C  | 1.76468400  | -0.13103400 | -0.08600900 |
| C  | 1.02594900  | 1.08183700  | 0.05715300  |
| C  | -0.36564400 | 1.02828600  | 0.02206500  |
| C  | -1.04931700 | -0.17078400 | -0.13788700 |
| C  | -0.31367400 | -1.47855600 | -0.17497700 |
| C  | 1.16772500  | -1.33704400 | -0.23669800 |
| H  | 1.53872200  | 2.03237000  | 0.18491100  |
| H  | 1.75769300  | -2.24570300 | -0.35247800 |
| O  | -2.37727000 | -0.14351700 | -0.19241300 |
| C  | -3.11798300 | -1.33386900 | -0.39182000 |
| H  | -4.17033500 | -1.05674800 | -0.27398000 |
| H  | -2.96470200 | -1.72377000 | -1.41018600 |
| H  | -2.84468100 | -2.09805000 | 0.34648200  |
| H  | -0.67515400 | -2.08993100 | -1.02143800 |
| F  | -0.66840800 | -2.21412500 | 0.96886300  |
| Cl | -1.27906700 | 2.49433700  | 0.15277100  |
| Cl | 3.49799900  | -0.00586200 | -0.09187400 |

**TS4c1-1**

|    |             |             |             |
|----|-------------|-------------|-------------|
| C  | 1.73890197  | -0.18498789 | -0.08726773 |
| C  | 1.00168597  | 1.02460811  | 0.07523627  |
| C  | -0.38940803 | 0.96095311  | 0.03215527  |
| C  | -1.07296403 | -0.23789489 | -0.13313673 |
| C  | -0.32588303 | -1.53774089 | -0.14429073 |
| C  | 1.15209797  | -1.39643789 | -0.23681873 |
| H  | 1.51201297  | 1.97748911  | 0.20868327  |
| H  | 1.73714597  | -2.30505989 | -0.38464973 |
| O  | -2.39475403 | -0.22174589 | -0.20068073 |
| C  | -3.12939303 | -1.41365089 | -0.47823573 |
| H  | -4.18533903 | -1.13124389 | -0.41934073 |
| H  | -2.90439703 | -1.77503489 | -1.49198873 |
| H  | -2.91154103 | -2.19257489 | 0.26377727  |
| H  | -0.70645603 | -2.20577489 | -0.93185573 |
| F  | -0.69255561 | -2.31463068 | 1.25376015  |
| Cl | -1.31080903 | 2.43383911  | 0.16214627  |
| Cl | 3.48312097  | -0.05078389 | -0.12794373 |
| C  | -2.47575659 | -4.15120091 | 3.21867624  |
| H  | -2.60753361 | -4.65441417 | 4.18580141  |
| H  | -3.24295528 | -3.36349118 | 3.13270866  |
| H  | -2.64158635 | -4.89253823 | 2.41905736  |
| O  | -1.16728234 | -3.62255844 | 3.18862872  |
| H  | -0.99223125 | -3.04657220 | 2.10204794  |

**P3**

|    |             |             |             |
|----|-------------|-------------|-------------|
| C  | 1.74120800  | -0.13290200 | 0.00919000  |
| C  | 1.33588700  | -1.45507200 | -0.15844300 |
| C  | -0.02018900 | -1.73547000 | -0.29734600 |
| C  | -0.97366900 | -0.71659200 | -0.27893600 |
| C  | -0.53793200 | 0.60610200  | -0.10917500 |
| C  | 0.81374800  | 0.90601600  | 0.03260100  |
| H  | 2.07985200  | -2.25074300 | -0.17950800 |
| H  | -0.37188500 | -2.75854200 | -0.43702600 |
| H  | 1.13577000  | 1.93927100  | 0.15474200  |
| O  | -2.28602700 | -1.01124800 | -0.44900700 |
| C  | -3.04344300 | -1.07492700 | 0.74532900  |
| H  | -4.07496800 | -1.30732600 | 0.45751000  |
| H  | -2.66142200 | -1.86826500 | 1.40859300  |
| H  | -3.02477900 | -0.11273900 | 1.28049000  |
| Cl | -1.70572500 | 1.88789800  | -0.11037700 |
| Cl | 3.42996000  | 0.23359600  | 0.18378500  |

**6. The number of imaginary frequencies and Electronic Energy + Thermal Free Energy Correction for the optimized reactants, product and transition states obtained at the M06-2X-D3/ ma-def2-SVP level in the processes.**

Table 1. The number of imaginary frequencies and the relative Gibbs free energy of transition states in the reaction of R1+R2 to P1.

| Transition states | Imaginary frequency (cm <sup>-1</sup> ) | Electronic Energy + Thermal Free Energy Correction (a.u) |
|-------------------|-----------------------------------------|----------------------------------------------------------|
| TS1a1             | -654.94                                 | -1560.637882                                             |
| TS2a1             | -474.12                                 | -307.547061                                              |
| TS1a2             | -709.65                                 | -1560.424226                                             |
| TS3c2-1           | -1581.00                                | -1792.329308                                             |
| TS3c2-2           | -676.25                                 | -383.220968                                              |
| TS3c2-3           | -2075.61                                | -457.714411                                              |
| TS3c2-4           | -521.32                                 | -1791.721126                                             |

Table 2. The number of imaginary frequencies and the relative Gibbs free energy of transition states in the reaction of R3+R2 to P2.

| Transition states | Imaginary frequency (cm <sup>-1</sup> ) | Electronic Energy + Thermal Free Energy Correction (a.u) |
|-------------------|-----------------------------------------|----------------------------------------------------------|
| TS1b1             | -1023.77                                | -2213.603338                                             |
| TS2b1             | -432.96                                 | -2288.715115                                             |
| TS3b1             | -1894.97                                | -2288.697836                                             |
| TS1b2             | -709.65                                 | -1560.424226                                             |
| TS2b2             | -2585.68                                | -805.135511                                              |

Table 3. The number of imaginary frequencies and the relative Gibbs free energy of transition states in the reaction of R4+R5 to P3.

| Transition states | Imaginary frequency (cm <sup>-1</sup> ) | Electronic Energy + Thermal Free Energy Correction (a.u) |
|-------------------|-----------------------------------------|----------------------------------------------------------|
| TS1c1             | -911.40                                 | -1599.871448                                             |
| TS2c1             | -602.16                                 | -1364.858035                                             |
| TS3c1             | -2077.59                                | -1480.421611                                             |
| TS1c2             | -993.66                                 | -1599.667057                                             |
| TS1c3             | -956.60                                 | -1365.232254                                             |
| TS3c1-1           | -147.36                                 | -1364.868023                                             |
| TS4c1-1           | -188.01                                 | -1480.423725                                             |



Table 4. The relative Gibbs free energy of reactants, intermediates and product in the reaction of R1+R2 to P1.

| Names                | Electronic Energy + Thermal Free Energy Correction (a.u) |
|----------------------|----------------------------------------------------------|
| <sup>3</sup> DDQ*    | -1484.119263                                             |
| R1                   | -231.907771                                              |
| DDQ <sup>-</sup>     | -1484.377980                                             |
| IM1a1                | -231.656831                                              |
| R2                   | -76.342752                                               |
| R2+ DDQ <sup>-</sup> | -1560.714215                                             |
| DDQH <sup>-</sup>    | -1484.983802                                             |
| IM2a1                | -75.658605                                               |
| IM3a1                | -307.576144                                              |
| DDQH <sup>·</sup>    | -1484.789778                                             |
| O <sub>2</sub>       | -150.169596                                              |
| IM2a2-3              | -457.749423                                              |
| DDQH <sub>2</sub>    | -1485.420437                                             |
| IM3a2-3              | -457.774041                                              |
| ·HO <sub>2</sub>     | -150.748207                                              |
| P1                   | -307.057089                                              |

Table 5. The relative Gibbs free energy of reactants, intermediates and product in the reaction of R3+R2 to P2.

| Names | Electronic Energy + Thermal Free Energy Correction (a.u) |
|-------|----------------------------------------------------------|
| R3    | -729.496600                                              |
| IM1b1 | -728.820981                                              |
| IM2b1 | -728.848525                                              |
| IM3b1 | -728.670801                                              |
| IM4b1 | -804.600948                                              |
| IM5b1 | -803.938590                                              |
| IM1b2 | -75.658605                                               |
| IM1b3 | -729.263143                                              |
| P2    | -803.431908                                              |

Table 6. The relative Gibbs free energy of reactants, intermediates and product in the reaction of R4+R5 to P3.

| Names                | Electronic Energy + Thermal Free Energy Correction (a.u) |
|----------------------|----------------------------------------------------------|
| <sup>3</sup> DDQ*    | -1484.123743                                             |
| R4                   | -1249.986414                                             |
| IM1c1                | -1249.726528                                             |
| DDQ <sup>-</sup>     | -1484.382554                                             |
| R5                   | -115.559718                                              |
| R5+ DDQ <sup>-</sup> | -1599.934581                                             |
| DDQH <sup>-</sup>    | -1484.987202                                             |
| IM2c1                | -114.900905                                              |
| IM3c1                | -1364.893106                                             |
| IM4c1-1              | -1364.889612                                             |
| IM1c3                | -1264.976238                                             |
| DDQ                  | -1484.192874                                             |
| HF                   | -100.351323                                              |
| P3                   | -1265.207635                                             |
